# Supplementary material for: Budding yeast chromatin is dispersed in a crowded nucleoplasm in vivo
Source: PubMed Central journal article supplement — Mol Biol Cell. 2016 Nov 1;27(21):3357–68. doi: 10.1091/mbc.E16-07-0506 (PMC5170867; doi:10.1091/mbc.e16-07-0506), 2016-11-01
Supplement: supp_E16-07-0506v1_NewMaterials.pdf [file supp_E16-07-0506v1_NewMaterials.pdf]

# Supplemental Materials

*Molecular Biology of the Cell*

Chen et al.

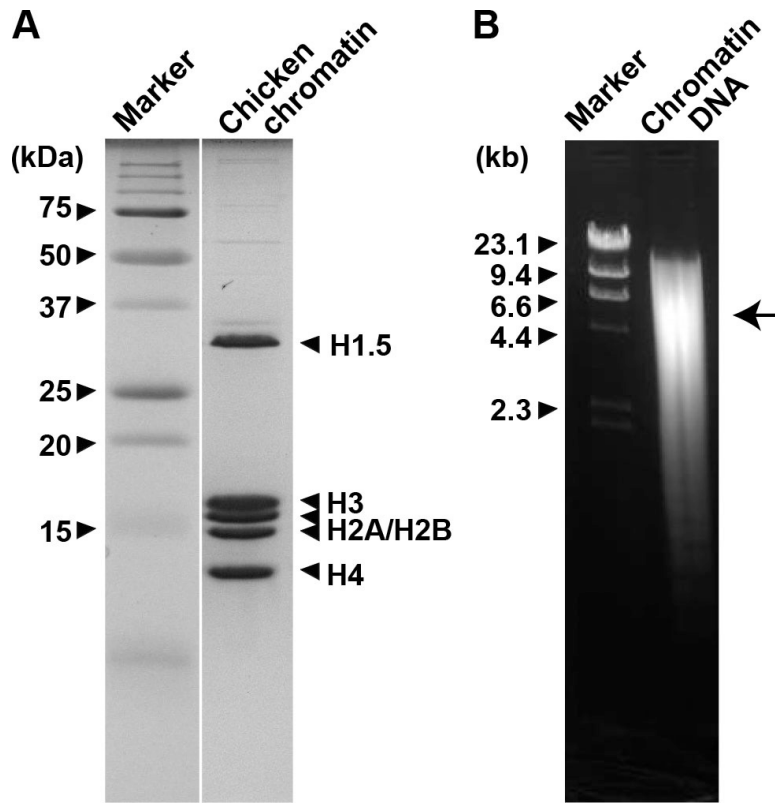

5

6 **Figure S1. Isolation of chicken erythrocyte chromatin**

7 **(A)** SDS-PAGE of purified chromatin. Nucleosome core histones H2A/H2B, H3 and H4

8 as well as linker histone H1.5 are present in the sample. **(B)** Agarose gel of isolated

9 chromatin DNA. Average DNA length is ~5 kb (arrow).

10

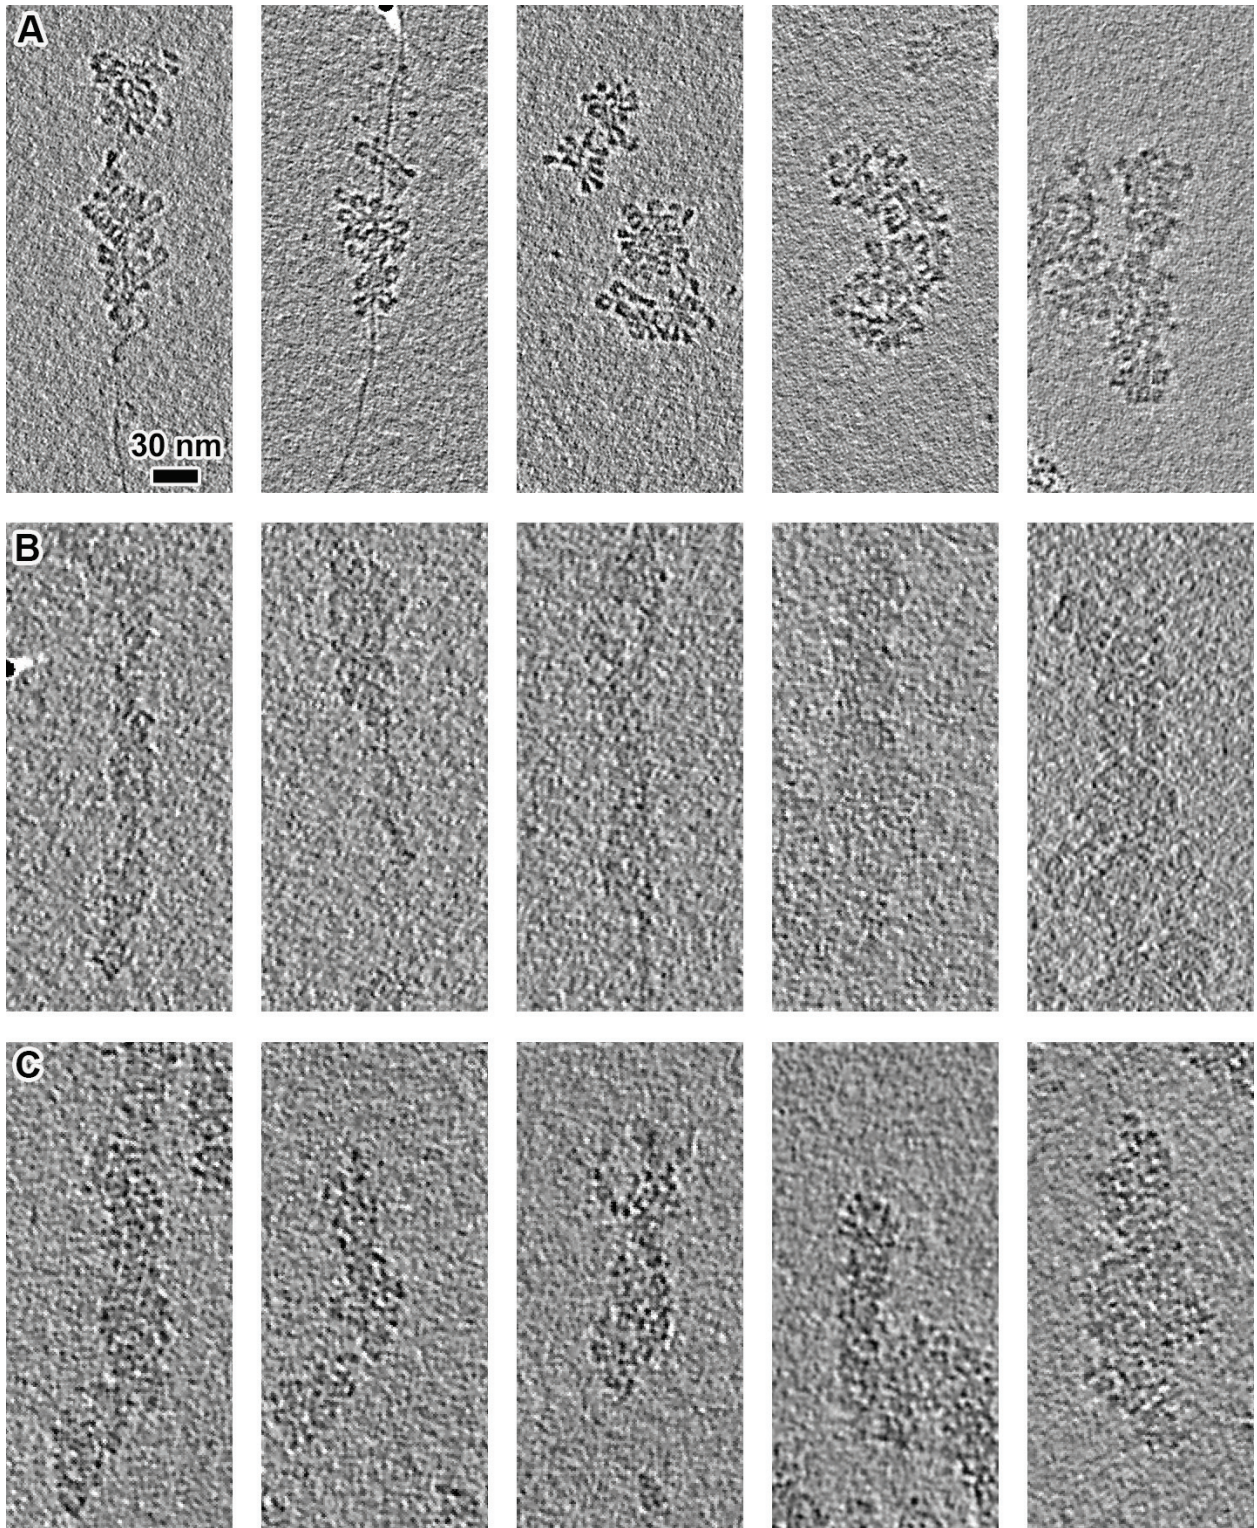

11

12 **Figure S2. 30-nm fibers are recognizable regardless of cryo-EM sample-**

13 **preparation method**

14 Row **(A)**: plunge-frozen in isolation buffer; row **(B)**: plunge-frozen in isolation buffer plus  
15 20% dextran; row **(C)**: high-pressure frozen in isolation buffer plus 20% dextran, then  
16 cryosectioned. Note that the addition of dextran substantially lowers the image contrast.

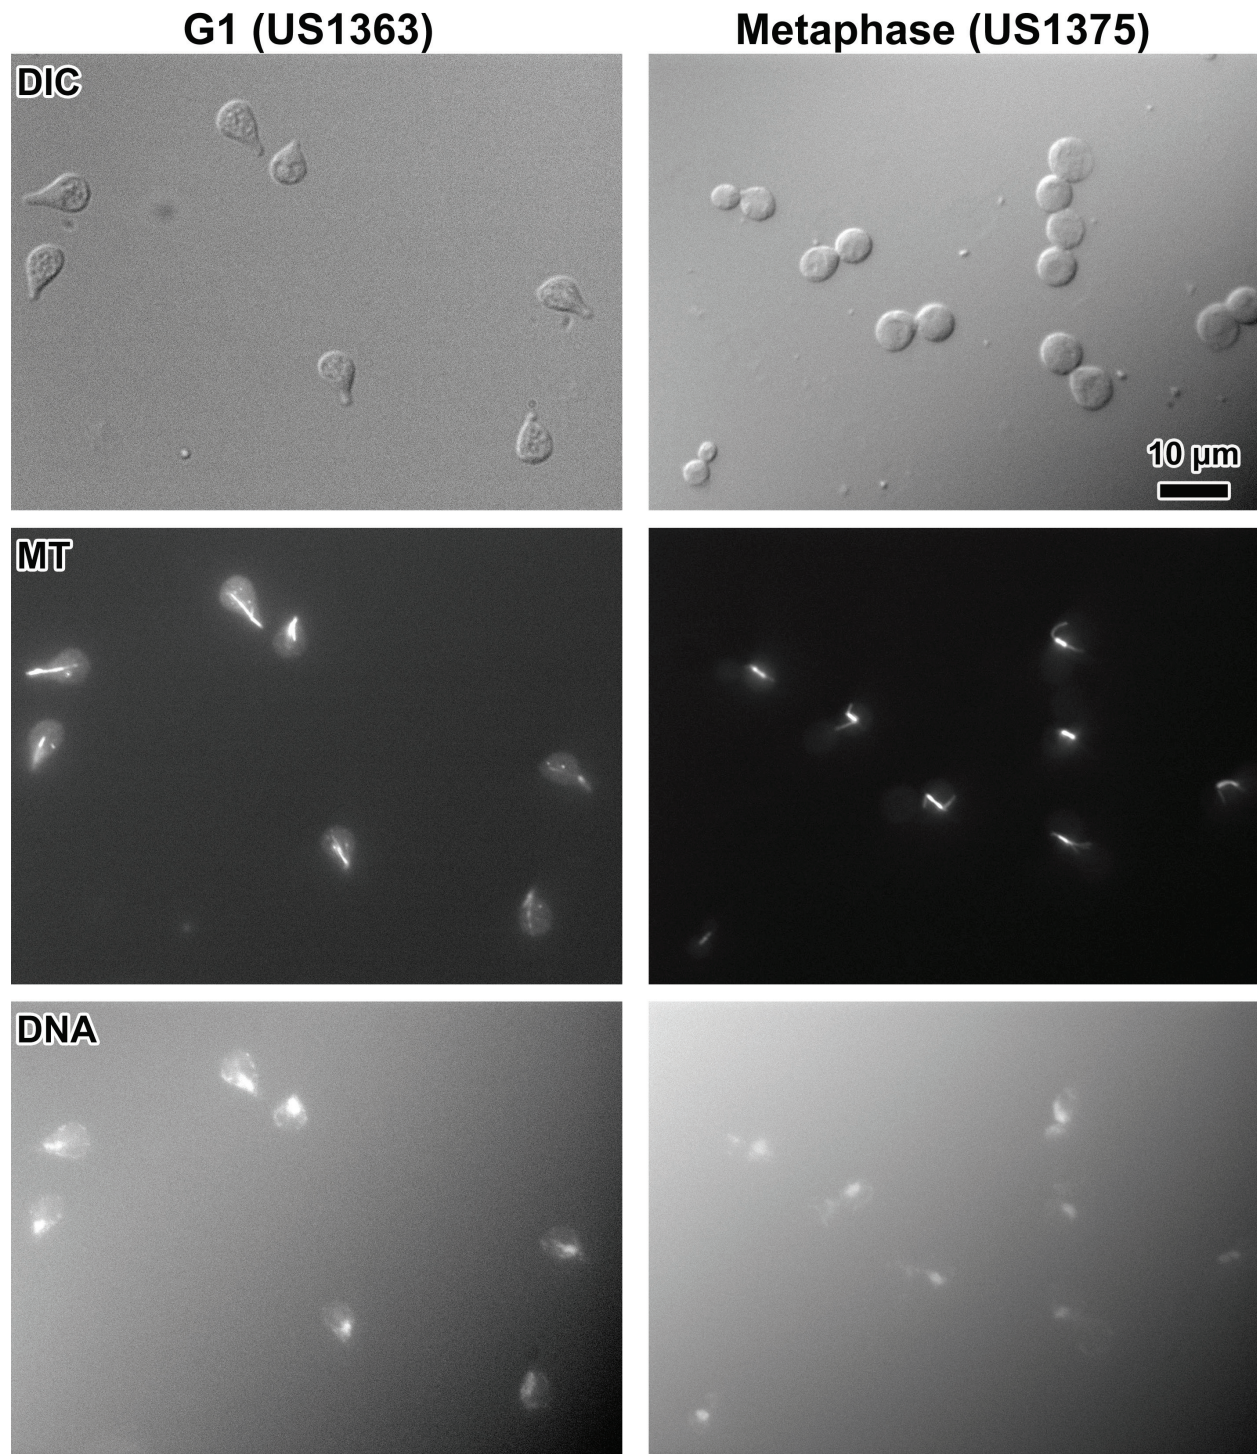

17

18 **Figure S3. Synchronization of *S. cerevisiae***

19 US1363 cells are arrested at G1 and show the characteristic “shmoo” morphology (left

20 column) when incubated with  $\alpha$ -factor; *cdc20* $\Delta$  *GAL-CDC20* (US1375) mutants are

21 arrested at metaphase in presence of glucose. These metaphase cells have a  
22 characteristic large-bud morphology and a short, bar-shaped spindle (right column).

23

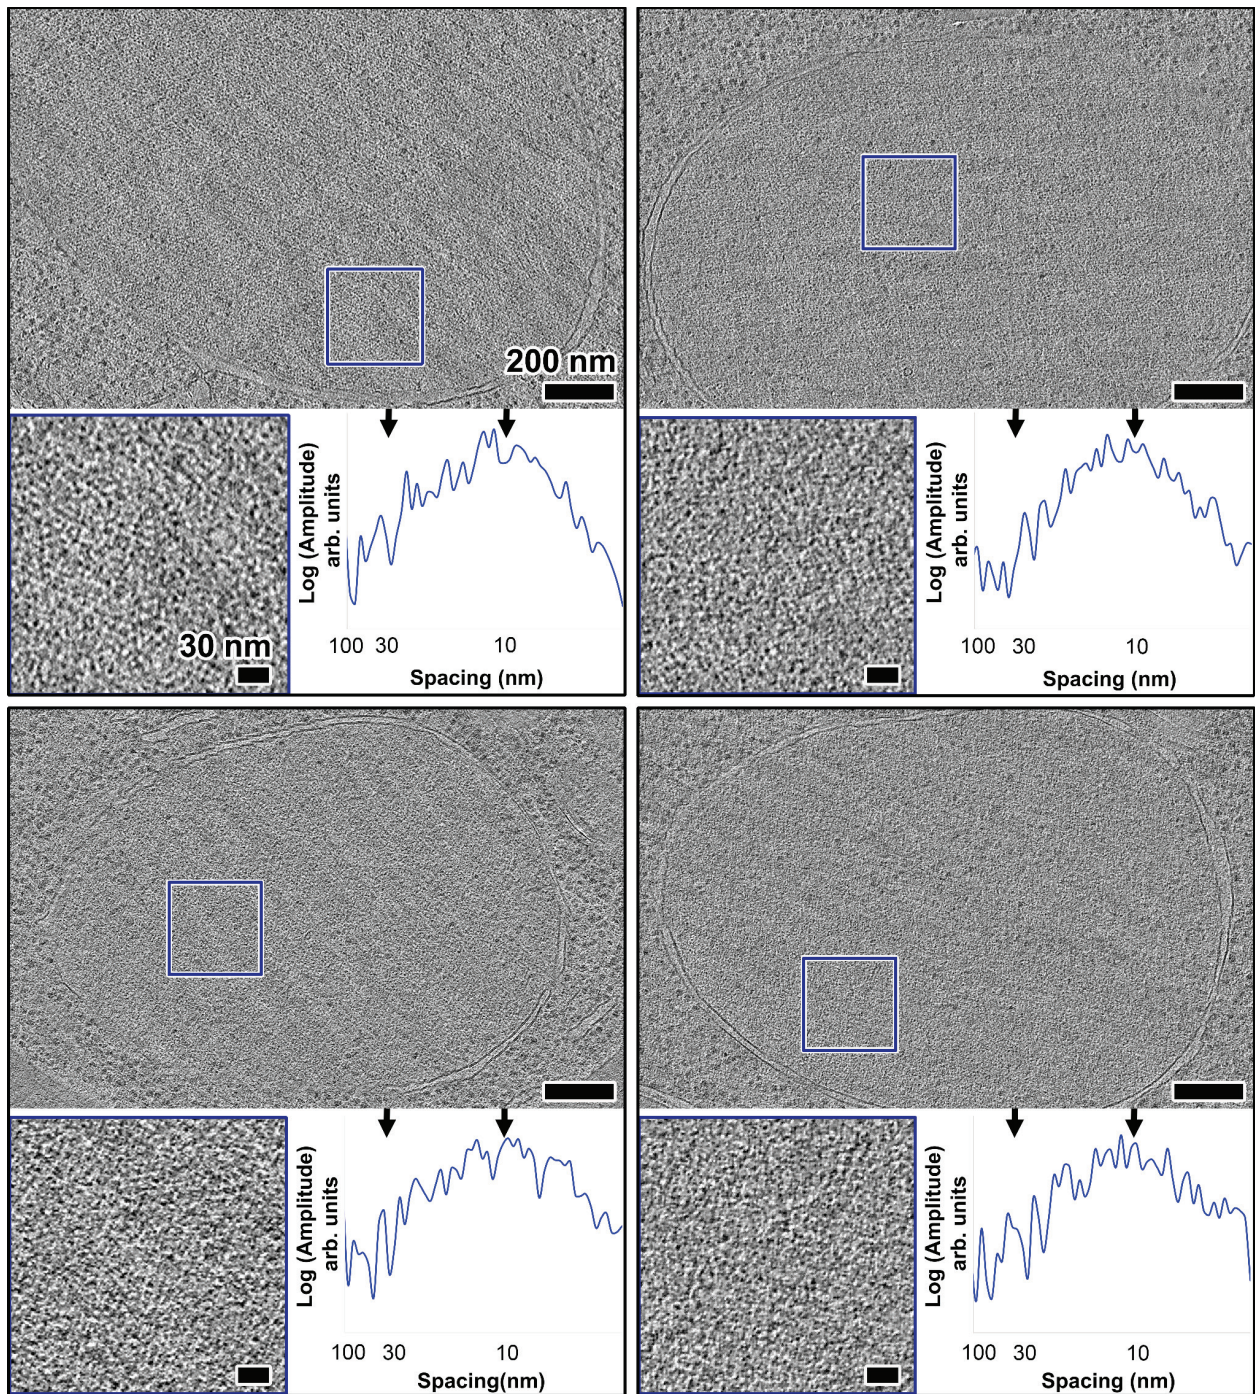

24

25 **Figure S4A. Additional examples of G1-arrested cells**

26 Tomographic slices (30-nm thick) of four more G1 cells. The lower left subpanel is a 3-

27 fold enlargement of the area boxed in blue. The lower right subpanel shows a

28 rotationally averaged power spectrum of this area. Arrows indicate 30- and 10-nm

29 spacings.



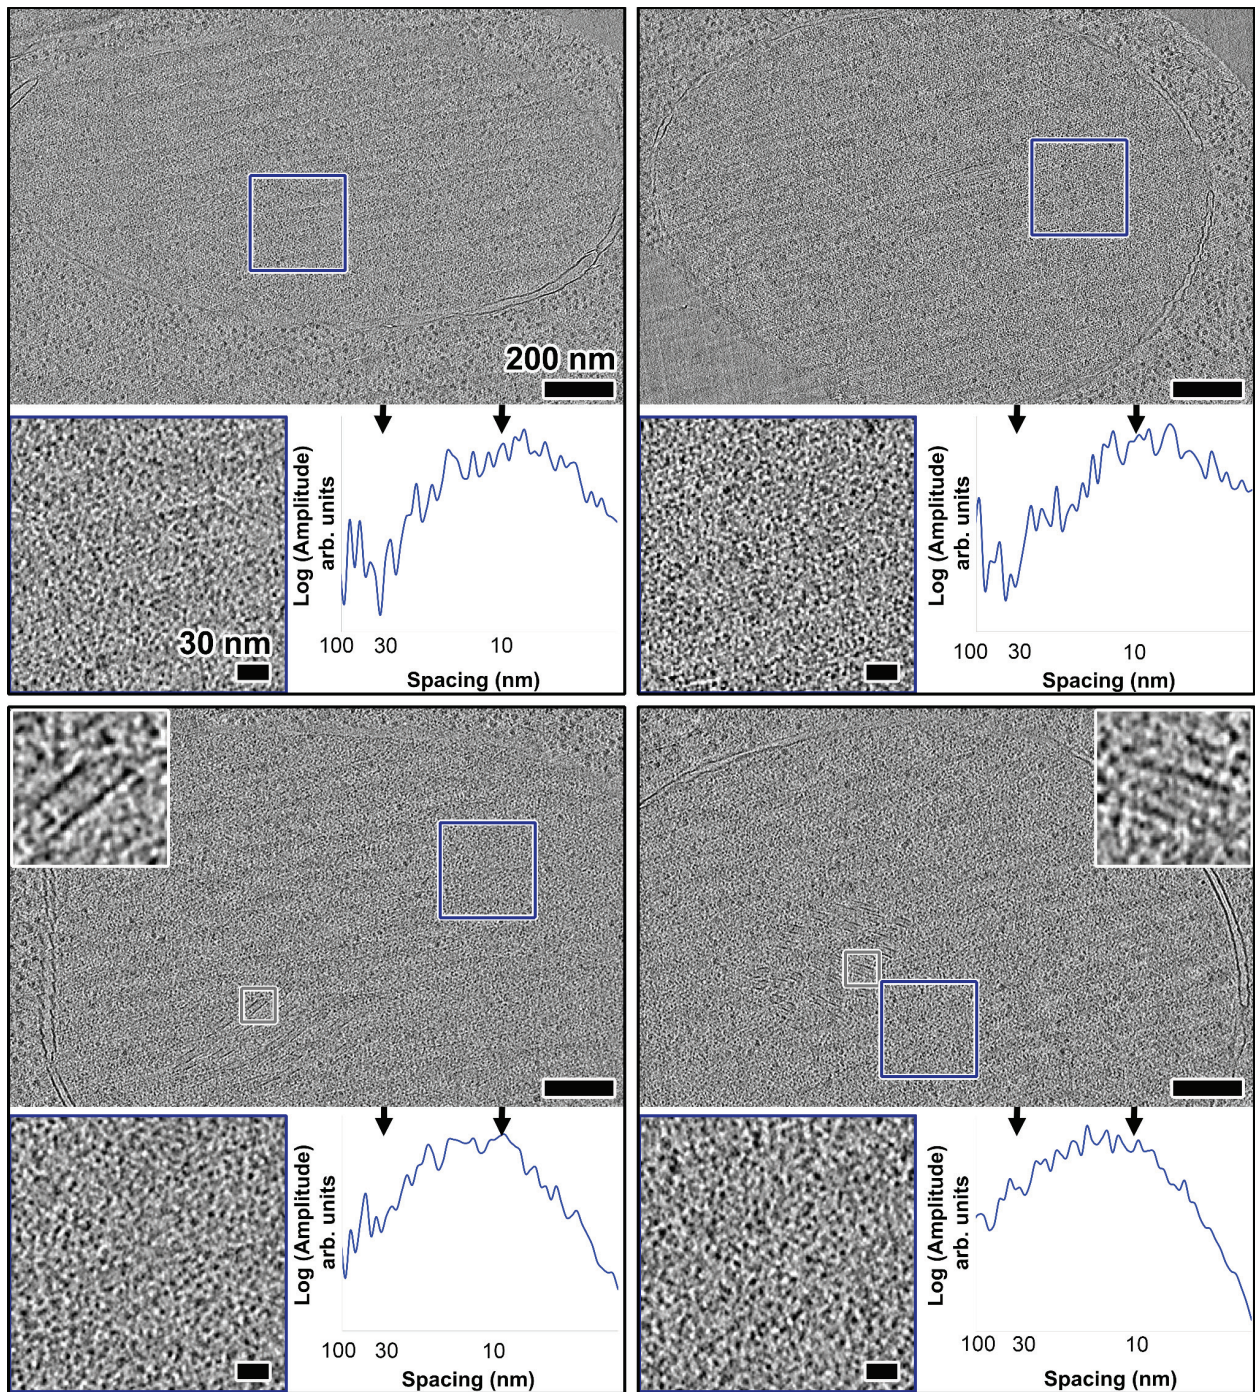

30

31 **Figure S4B. Additional examples of metaphase-arrested cells**

32 Tomographic slices (30-nm thick) of four more metaphase cells. The lower left subpanel

33 is a 3-fold enlargement of the area boxed in blue. The lower right subpanel shows a

34 rotationally averaged power spectrum of this area. Arrows indicate 30- and 10-nm

35 spacings. For the two cells in the lower panels, the upper subpanels show spindle  
36 microtubules, boxed in grey and enlarged 5-fold.

37

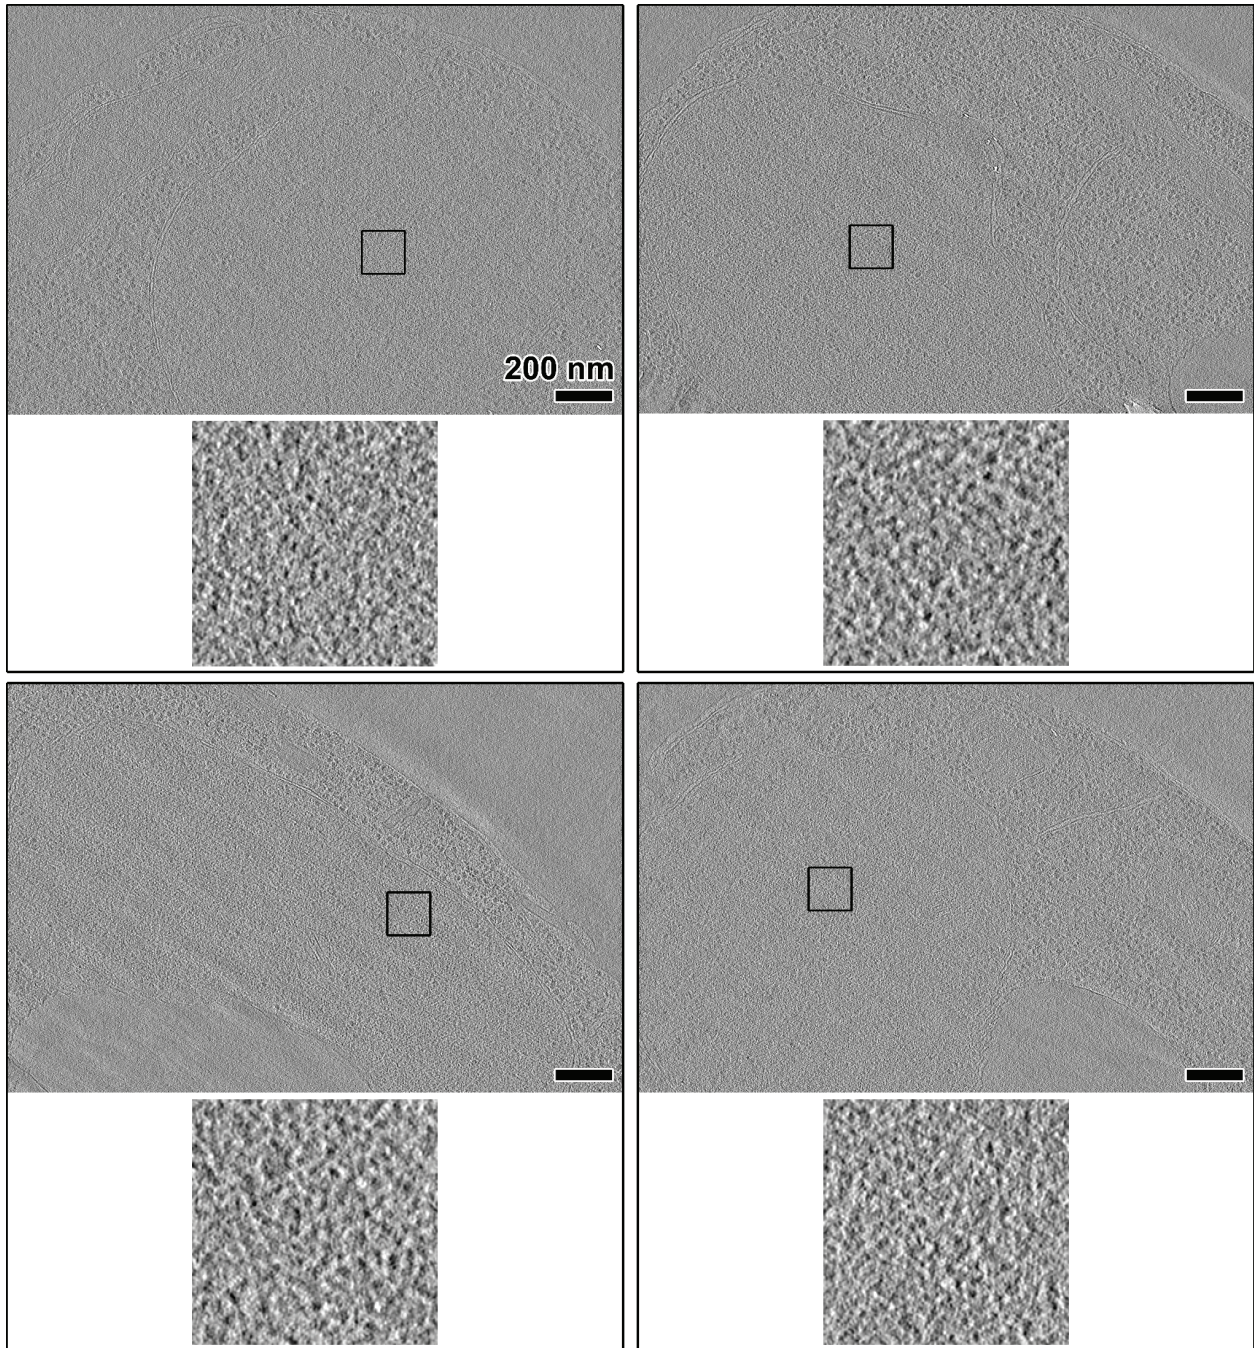

38

39 **Figure S4C. Additional examples of formaldehyde-fixed cells**

40 Tomographic slices (10-nm thick) of four more wild-type cells, fixed in formaldehyde. A  
41 region inside each nucleus is boxed out and enlarged 6-fold in the lower subpanel.

42

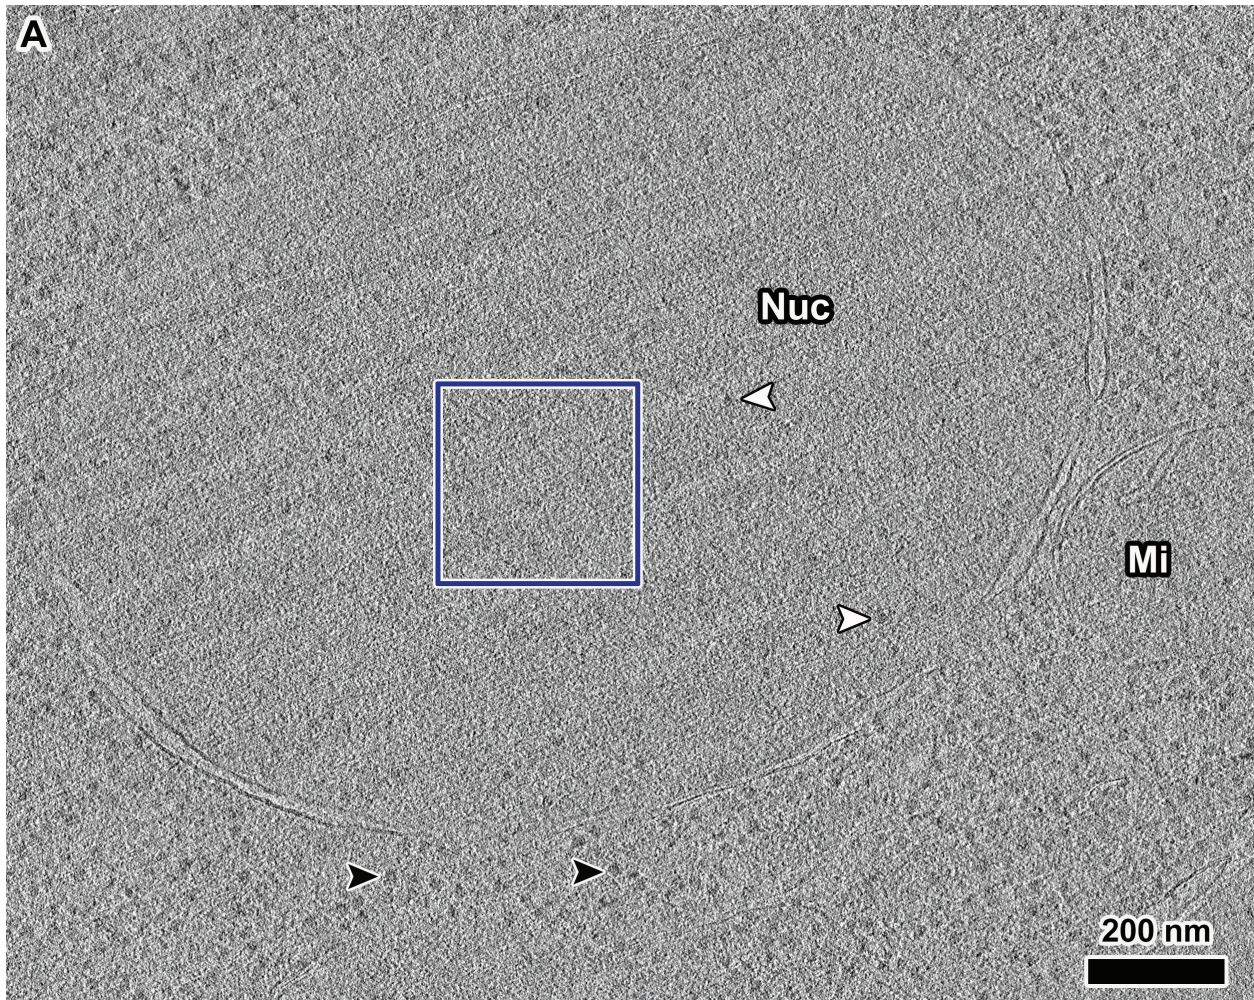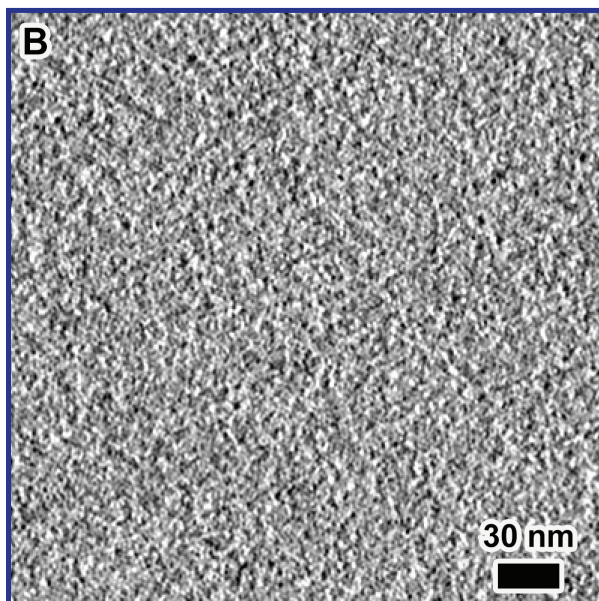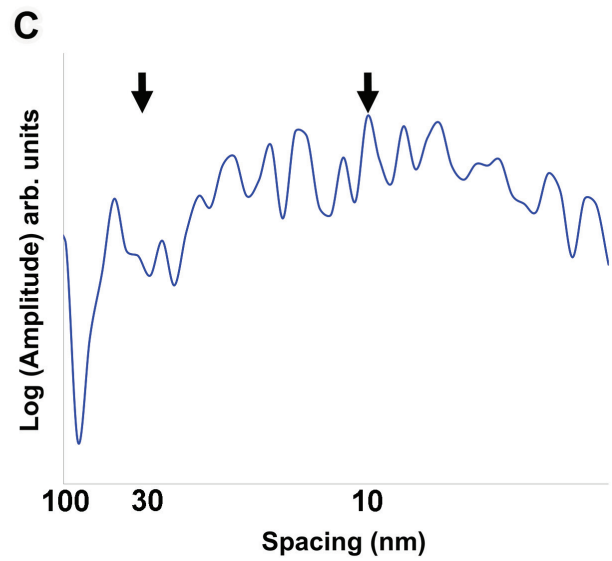

43

44

**Figure S5. 30-nm fiber signals are absent regardless of imaging conditions**

45 **(A)** Tomographic slice (30-nm thick) of a nucleus in a G1-arrested cell that was imaged  
46 much closer to focus ( $-3\ \mu\text{m}$ ) than the other cells presented in this paper. The nucleus  
47 (Nuc) and a mitochondrion (Mi) are labeled. White arrows: intranuclear ribosome-sized  
48 densities; black arrows: cytoplasmic ribosome densities. **(B)** A 3-fold enlargement of the  
49 intranuclear position boxed in panel (A). **(C)** Rotationally averaged power spectrum of  
50 (B). Arrows point to 30- and 10-nm spacings.

51

52 **Table S1. Tomogram details**

| <b>ID</b>        | <b>Figure</b>        | <b>Sample</b> | <b>Method</b> | <b>Dose</b> | <b>Defocus</b> |
|------------------|----------------------|---------------|---------------|-------------|----------------|
| 15apr11_chrom_01 | 1A,B                 | F             | PF            | 100         | -6             |
| 15may29_chrom_19 | 1C,D                 | F             | PF            | 100         | -6             |
| 15apr29_chrom_15 | 1E,F                 | F             | VS            | 100         | -10            |
| 15mar02a__070    | 2A,C,D               | G1            | VS            | 100         | -8             |
| 14oct01a__027    | 2B,E,F +<br>Movie S1 | M             | VS            | 100         | -10            |
| 15mar02a__074    | 3A,B,C,D             | G1            | VS            | 100         | -8             |
| 14oct01a__032    | 3E,F,G,H             | M             | VS            | 100         | -8             |
| 15oct12_yeast_12 | 4A,B                 | G1            | VS            | 100         | -8             |
| 16jan29_yeast_10 | 4C,D                 | UF            | VS            | 100         | -12            |
| 15mar02a_065     | 5A,B                 | G1            | VS            | 100         | -11            |
| 15apr11_chrom_01 | S2A                  | F             | PF            | 100         | -6             |
| 15apr11_chrom_02 | S2A                  | F             | PF            | 100         | -6             |
| 15may29_chrom_11 | S2B                  | F             | PF            | 100         | -8             |
| 15may29_chrom_15 | S2B                  | F             | PF            | 100         | -6             |

|                  |     |    |    |     |     |
|------------------|-----|----|----|-----|-----|
| 15may29_chrom_21 | S2B | F  | PF | 100 | -6  |
| 15apr29_chrom_32 | S2C | F  | VS | 100 | -10 |
| 15may05_chrom_07 | S2C | F  | VS | 100 | -10 |
| 15mar02a__046    | S4A | G1 | VS | 100 | -8  |
| 15oct12_yeast_02 | S4A | G1 | VS | 100 | -6  |
| 15oct12_yeast_03 | S4A | G1 | VS | 100 | -4  |
| 15oct12_yeast_04 | S4A | G1 | VS | 100 | -4  |
| 14oct01a__014    | S4B | M  | VS | 100 | -10 |
| 14oct01a__021    | S4B | M  | VS | 100 | -10 |
| 14oct01a__052    | S4B | M  | VS | 100 | -8  |
| 14oct01a__067    | S4B | M  | VS | 100 | -8  |
| 16jan29_yeast_01 | S4C | UF | VS | 100 | -8  |
| 16jan29_yeast_05 | S4C | UF | VS | 100 | -12 |
| 16jan29_yeast_09 | S4C | UF | VS | 100 | -12 |
| 16jan29_yeast_17 | S4C | UF | VS | 100 | -8  |
| 15oct12_yeast_15 | S5  | G1 | VS | 100 | -3  |

53 **ID:** Legion data ID for data collected by Leginon or manually assigned ID for data  
54 collected by FEI Tomo.

55 **Sample:** (M) metaphase-arrested yeast; (G1) G1-arrested yeast; (UF) unsynchronized  
56 and formaldehyde-fixed yeast; (F) purified chicken erythrocyte chromatin.  
57 **Method:** (VS) vitreous sections, (PF) plunge-freezing.  
58 **Dose:** Electrons / Å<sup>2</sup>.  
59 **Defocus:** Nominal values in μm; fitted values are reported in Table S2.



60 **Table S2. Cryotomography imaging conditions**

| Sample                   | Purified chromatin                   | <i>S. cerevisiae</i> cells                           |
|--------------------------|--------------------------------------|------------------------------------------------------|
| EM grid                  | CF-22-2C-T (Protochips)              | CF-42-2C-T (Protochips) /<br>continuous carbon (EMS) |
| Microscope               | Titan Krios                          |                                                      |
| Energy                   | 300 keV                              |                                                      |
| Gun type                 | FEG                                  |                                                      |
| Camera                   | Falcon II Direct Detector            | Falcon I or II Direct Detector                       |
| Tomography software      | FEI TOMO 3 and 4                     | Leginon                                              |
| Calibrated magnification | 23,986                               | 15,678 / 19,167                                      |
| Calibrated pixel size    | 5.84 Å                               | 8.93 / 7.47 Å                                        |
| Defocus (fitted)         | -6 to -8 µm                          | -3 to -15 µm                                         |
| Cumulative dose          | 80 to 100 electrons / Å <sup>2</sup> |                                                      |
| Dose fractionation       | 1 / cosine                           |                                                      |
| Tilt range               | ±60°                                 |                                                      |
| Tilt increment           | 2°                                   |                                                      |
